# Supplementary material
Source: PubMed Central journal article supplement (PMC1360714)
Supplement: bj3930619add.pdf [file bj3930619add.pdf]

## Chemical shifts for Kalata B8

| Chemical shift | Atom | Residue |
|----------------|------|---------|
| 7.587          | HN   | 1       |
| 4.952          | HA   | 1       |
| 3.629          | HB2  | 1       |
| 2.311          | HB3  | 1       |
| 8.410          | HN   | 2       |
| 3.804          | HA1  | 2       |
| 3.533          | HA2  | 2       |
| 4.483          | HA   | 3       |
| 2.560          | HB2  | 3       |
| 2.402          | HB3  | 3       |
| 1.952          | HG2  | 3       |
| 1.798          | HG3  | 3       |
| 8.581          | HN   | 4       |
| 4.388          | HA   | 4       |
| 4.270          | HB   | 4       |
| 1.201          | QG2  | 4       |
| 8.297          | HN   | 5       |
| 4.971          | HA   | 5       |
| 2.865          | HB2  | 5       |
| 2.343          | HB3  | 5       |
| 8.837          | HN   | 6       |
| 3.843          | HA   | 6       |
| 1.585          | QB   | 6       |
| 1.459          | HG   | 6       |
| 0.807          | QQD  | 6       |
| 7.994          | HN   | 7       |
| 4.382          | HA   | 7       |
| 1.629          | HB2  | 7       |
| 1.560          | HB3  | 7       |
| 1.419          | HG   | 7       |
| 0.765          | QD1  | 7       |
| 0.689          | QD2  | 7       |
| 7.673          | HN   | 8       |
| 4.143          | HA1  | 8       |
| 3.736          | HA2  | 8       |
| 7.355          | HN   | 9       |
| 4.325          | HA   | 9       |
| 3.538          | HB   | 9       |
| 0.557          | QG2  | 9       |
| 8.690          | HN   | 10      |
| 4.300          | HA   | 10      |
| 2.548          | HB2  | 10      |
| 2.944          | HB3  | 10      |
| 8.699          | HN   | 11      |
| 4.209          | HA   | 11      |
| 2.983          | HB2  | 11      |

|       |      |    |
|-------|------|----|
| 2.694 | HB3  | 11 |
| 6.596 | QE   | 11 |
| 6.955 | QD   | 11 |
| 7.956 | HN   | 12 |
| 4.167 | HA   | 12 |
| 4.006 | HB   | 12 |
| 1.172 | QG2  | 12 |
| 8.452 | HN   | 13 |
| 3.728 | HA   | 13 |
| 3.835 | HB   | 13 |
| 1.059 | QG2  | 13 |
| 8.790 | HN   | 14 |
| 4.018 | HA1  | 14 |
| 3.505 | HA2  | 14 |
| 7.602 | HN   | 15 |
| 4.883 | HA   | 15 |
| 3.281 | HB2  | 15 |
| 2.479 | HB3  | 15 |
| 9.369 | HN   | 16 |
| 4.356 | HA   | 16 |
| 3.917 | HB   | 16 |
| 0.953 | QG2  | 16 |
| 8.669 | HN   | 17 |
| 4.355 | HA   | 17 |
| 2.791 | HB2  | 17 |
| 2.552 | HB3  | 17 |
| 8.624 | HN   | 18 |
| 4.559 | HA   | 18 |
| 3.408 | HB2  | 18 |
| 2.870 | HB3  | 18 |
| 7.120 | HD21 | 18 |
| 7.412 | HD22 | 18 |
| 8.256 | HN   | 19 |
| 3.820 | HA   | 19 |
| 1.465 | QB   | 19 |
| 0.324 | QG   | 19 |
| 1.253 | HD2  | 19 |
| 0.784 | HD3  | 19 |
| 2.589 | QE   | 19 |
| 7.324 | QZ   | 19 |
| 7.410 | HN   | 20 |
| 4.402 | HA   | 20 |
| 3.226 | HB2  | 20 |
| 2.576 | HB3  | 20 |
| 6.645 | QE   | 20 |
| 6.897 | QD   | 20 |
| 8.095 | HN   | 21 |
| 3.635 | HA   | 21 |
| 2.143 | QB   | 21 |
| 1.496 | HG2  | 21 |

|       |     |    |
|-------|-----|----|
| 1.434 | HG3 | 21 |
| 3.054 | QD  | 21 |
| 6.735 | HE  | 21 |
| 7.666 | HN  | 22 |
| 4.050 | HA  | 22 |
| 1.681 | HB  | 22 |
| 0.712 | QG1 | 22 |
| 0.677 | QG2 | 22 |
| 0.674 | QQG | 22 |
| 8.209 | HN  | 23 |
| 4.928 | HA  | 23 |
| 3.110 | HB2 | 23 |
| 2.602 | HB3 | 23 |
| 9.492 | HN  | 24 |
| 4.725 | HA  | 24 |
| 3.735 | HB  | 24 |
| 0.885 | QG2 | 24 |
| 8.450 | HN  | 25 |
| 4.540 | HA  | 25 |
| 1.650 | QB  | 25 |
| 1.194 | HG2 | 25 |
| 1.057 | HG3 | 25 |
| 1.483 | HD2 | 25 |
| 1.440 | HD3 | 25 |
| 1.456 | QD  | 25 |
| 2.754 | QE  | 25 |
| 7.416 | QZ  | 25 |
| 9.485 | HN  | 26 |
| 4.199 | HA  | 26 |
| 2.908 | HB2 | 26 |
| 2.622 | HB3 | 26 |
| 8.575 | HN  | 27 |
| 4.021 | HA1 | 27 |
| 3.530 | HA2 | 27 |
| 7.746 | HN  | 28 |
| 4.692 | HA  | 28 |
| 3.753 | HB2 | 28 |
| 3.648 | HB3 | 28 |
| 8.202 | HN  | 29 |
| 4.186 | HA  | 29 |
| 2.154 | HB  | 29 |
| 0.803 | QG1 | 29 |
| 0.751 | QG2 | 29 |
| 8.134 | HN  | 30 |
| 3.956 | HA  | 30 |
| 1.440 | QB  | 30 |
| 1.362 | HG  | 30 |
| 0.751 | QD1 | 30 |
| 0.708 | QD2 | 30 |
| 0.708 | QQD | 30 |

|       |    |    |
|-------|----|----|
| 8.257 | HN | 31 |
| 4.412 | HA | 31 |
| 2.719 | QB | 31 |
